# Supplementary material for: Embedding in-plane aligned MOF nanoflakes in silk fibroin for highly enhanced output performance of triboelectric nanogenerators
Source: Royal Society of Chemistry journal article supplement (doi:10.1039/d1ta08605g), 2021-12-01
Supplement: d1ta08605g1.pdf [file d1ta08605g1.pdf]

## Supplementary information

### **Embedding in-plane aligned MOF nanoflakes in silk fibroin for highly enhanced output performance of triboelectric nanogenerator**

*Zixi Chen,<sup>a</sup> Yule Cao,<sup>a</sup> Weifeng Yang,<sup>b</sup> Lin An,<sup>b</sup> Hongwei Fan,<sup>b</sup> Yinben Guo<sup>a\*</sup>*

<sup>a</sup> School of Materials Engineering, Shanghai University of Engineering Science, Shanghai 201620, P.R. China.

<sup>b</sup> State Key Laboratory for Modification of Chemical Fibers and Polymer Materials, College of Materials Science and Engineering, Donghua University, Shanghai 201620, P.R. China.

\*Corresponding authors

E-mail address: [guoyb@sues.edu.cn](mailto:guoyb@sues.edu.cn) (Yinben Guo)

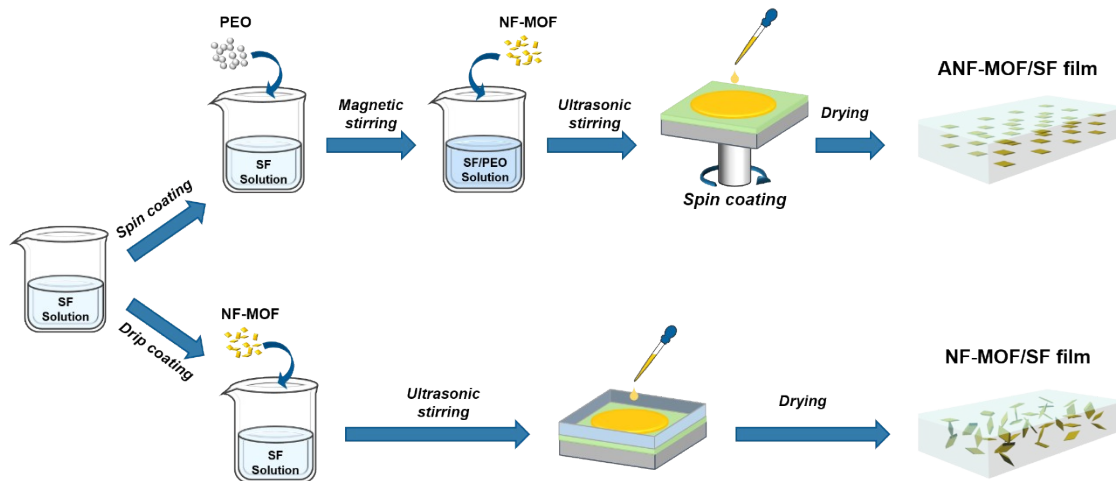

Figure S1 The fabrication process of NF-MOF/SF composite film and ANF-MOF/SF composite film.

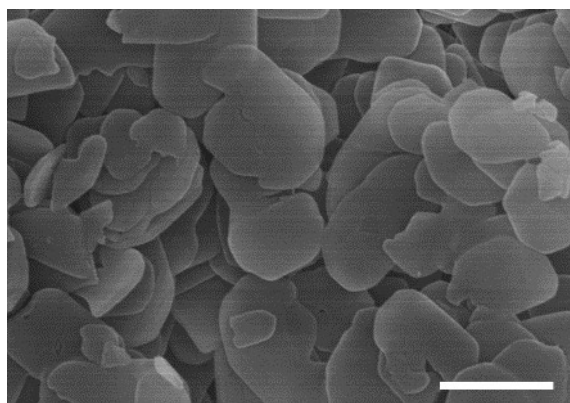

Figure S2 The SEM image of synthesized NF-MOF (scale bar:500 nm).

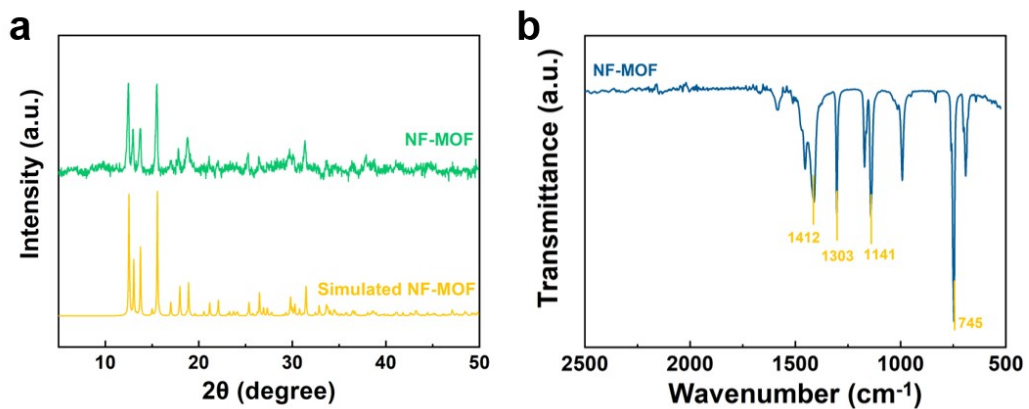

Figure S3 (a) Experimental and simulated XRD spectra of NF-MOF. (b) FT-IR spectra of NF-MOF.

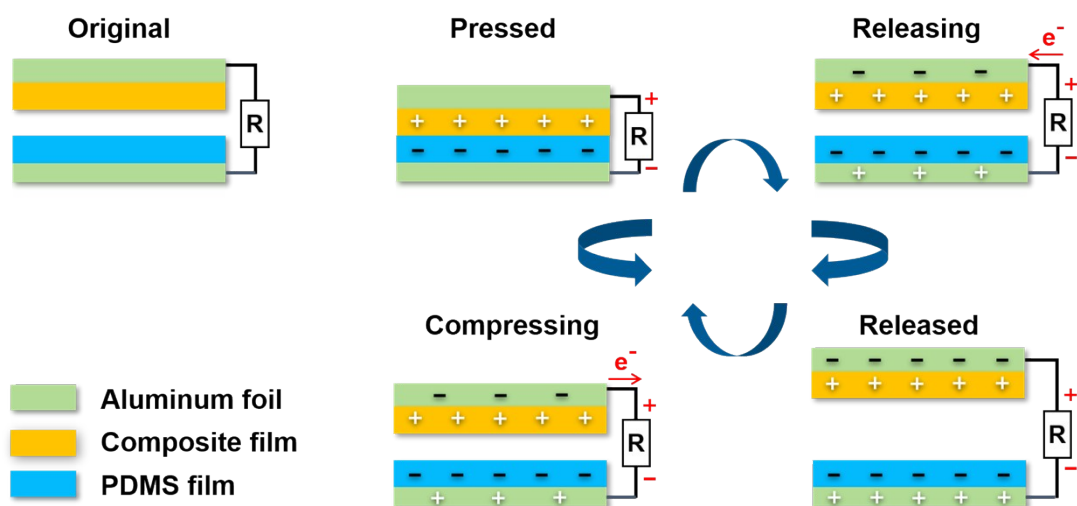

Figure S4 Schematic images of the working principle for the TENG.

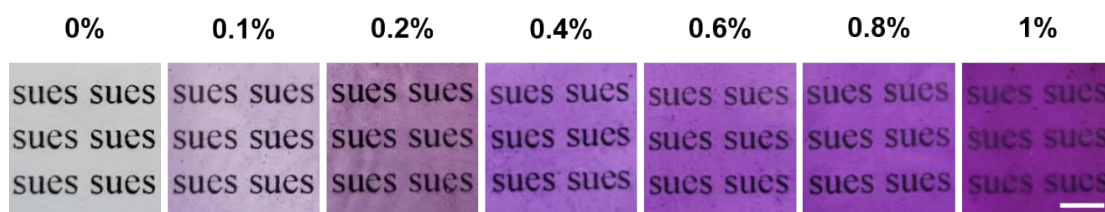

Figure S5 Digital photos of pure SF film and NF-MOF/SF composite film with a mass ratio ranging from 0.1 wt.% to 1 wt.% (scale bar: 5 mm).

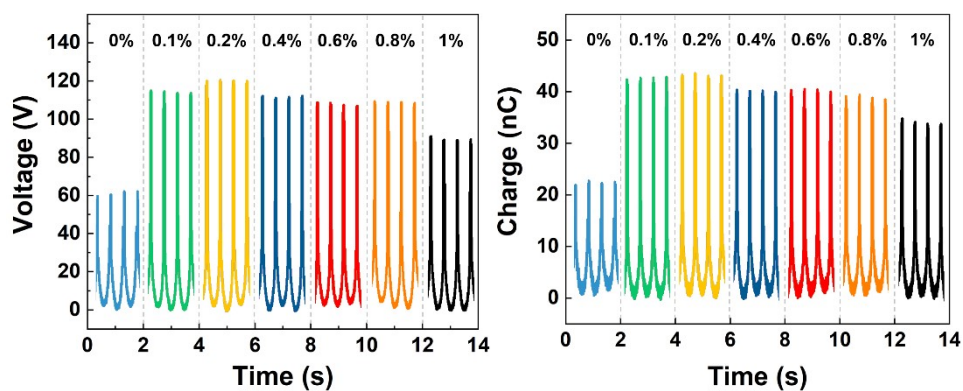

Figure S6 Output voltages and transfer charges of NS-TENG as a function of the mass ratios of NF-MOF in composite films ranging from 0 to 1 wt.%.
